# Supplementary material
Source: PubMed Central journal article supplement (PMC10976122)
Supplement: NIHMS1964879-supplement-Supplementary_figures___tables.pdf [file NIHMS1964879-supplement-Supplementary_figures___tables.pdf]

## Supplementary Figure

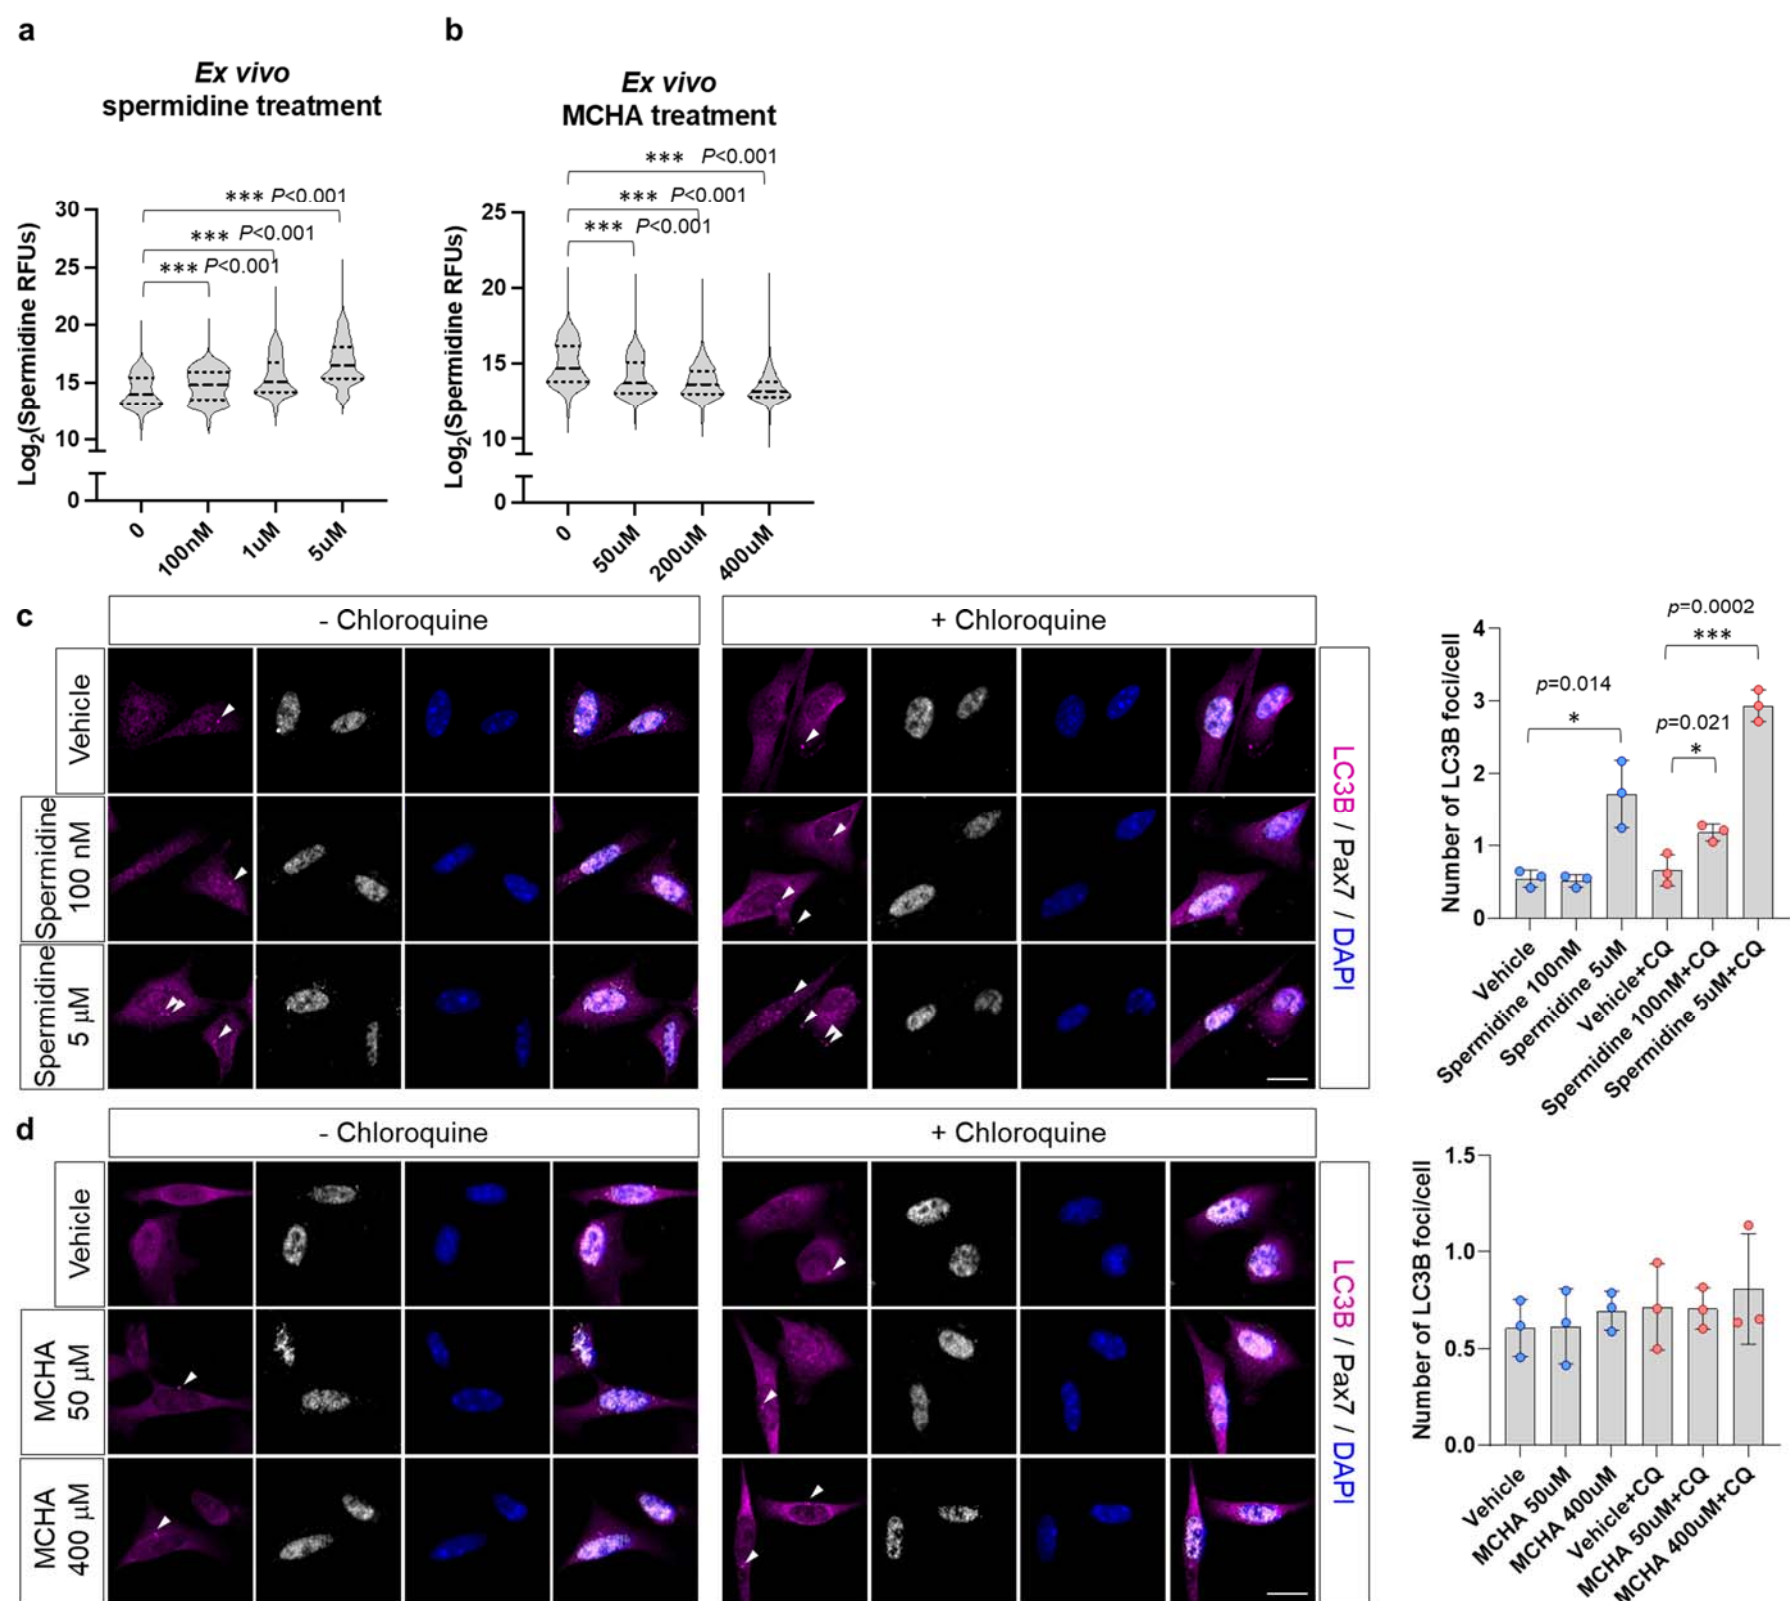

### Inhibiting spermidine synthesis does not impair autophagy of aged MuSCs.

**a-b**, Quantification of intracellular spermidine levels. Violin plots showing RFUs of spermidine in old MuSCs treated with each dose of spermidine (**a**) or MCHA (**b**) as indicated ( $n=3$ ). **c-d**, (Left) Representative confocal immunofluorescence images of old MuSCs treated with vehicle or each dose of spermidine (**c**) or MCHA (**d**) for 48 hr. In each case, cells were treated with or without 50  $\mu\text{M}$  of chloroquine (CQ) for the last 3 hr of incubation. (Right) Quantification of number of LC3B foci per cell. (Scale bar, 10  $\mu\text{M}$ ) Data are shown as median and quartiles (**a, b**) and mean  $\pm$  SD (**c, d**).  $P$  values were calculated by two-sided unpaired Student's  $t$ -tests (**a-d**).  $*P < 0.05$ ;  $**P < 0.01$ ;  $***P < 0.001$ .

**Supplementary Table 1. Donor information of human muscle specimen**

| DONOR                    | #1       | #2       | #3              |
|--------------------------|----------|----------|-----------------|
| AGE                      | 45       | 60       | 56              |
| SEX                      | Female   | Male     | Female          |
| ETHNICITY                | Filipino | Filipino | Hispanic/Latino |
| RACE                     | Asian    | Asian    | Not specified   |
| BMI (KG/M <sup>2</sup> ) | 35.372   | 29.202   | 24.901          |

**Supplementary Table 2. Sequences of oligonucleotide for siRNA and shRNA**

|                   | Target Sequence                        | Company/Catalog number                                          |
|-------------------|----------------------------------------|-----------------------------------------------------------------|
| si <i>Srm</i>     | GCA GUA AAA CCU ACG GCA A              | Dharmacon/ON-TARGETplus SMART pool Srm siRNA/J-062372-09        |
|                   | CCG UGG UGG ACU ACG CCU A              | Dharmacon/ON-TARGETplus SMART pool Srm siRNA/J-062372-10        |
|                   | GGG CGA UGG CUU UGA GUU C              | Dharmacon/ON-TARGETplus SMART pool Srm siRNA/J-062372-11        |
|                   | GCG AGA UUG AUG AGG AUG U              | Dharmacon/ON-TARGETplus SMART pool Srm siRNA/J-062372-12        |
| siControl         | UGG UUU ACA UGU CGA CUA A              | Dharmacon/ON-TARGETplus Non-targeting SMART pool/D-001810-10-05 |
|                   | UGG UUU ACA UGU UGU GUG A              |                                                                 |
|                   | UGG UUU ACA UGU UUU CUG A              |                                                                 |
|                   | UGG UUU ACA UGU UUU CCU A              |                                                                 |
| sh <i>Srm</i>     | TTC TCC TAC CAG GAG ATG ATC GCC AAC CT | Origene/TL502143A                                               |
|                   | TGC CAG TGG CTG CAC CTG GAC CTC ATC AA | Origene/TL502143B                                               |
|                   | TCT TCA AGG AGT CCT ATT ACC AGC TCA TG | Origene/TL502143C                                               |
|                   | TCG GAC ATG CAC CGT GCC GCC TTC GTA CT | Origene/TL502143D                                               |
| sh <i>Suv39h1</i> | Suv39h1 shRNA(m) Lentiviral Particles  | Santa Cruz Biotechnology/sc-38464-V                             |
| shControl         | Control shRNA Lentiviral Particles-A   | Santa Cruz Biotechnology/sc-108080                              |

**Supplementary Table 3. RT-qPCR primer sequences for polyamine metabolism enzymes**

| Gene         | Forward primer (5' to 3')       | Reverse primer (5' to 3')         |
|--------------|---------------------------------|-----------------------------------|
| <i>Srm</i>   | ACA TCC TCG TCT TCC GCA GTA     | GGC AGG TTG GCG ATC ATC T         |
| <i>Paox</i>  | CTT CGG TGG TGT AGT GGA GC      | TCC GAT AAT TCT TTC TCC CCC AG    |
| <i>Odc1</i>  | GAC GAG TTT GAC TGC CAC ATC     | CGC AAC ATA GAA CGC ATC CTT       |
| <i>Amdl1</i> | AGG GAT CTG GGG ATC TTC GTA     | TGC TTG TCA GTC TTT GTC ACA C     |
| <i>Sms</i>   | CAC AGC ACG CTC GAC TTC AA      | TGC CAT TCT TGT TCG TGT AAG TT    |
| <i>Sat1</i>  | GAG AAC ACC CCT TCTACC ACT      | GCC TCT GTA ATC ACT CAT CAC GA    |
| LINE1        | AGT GCA GAG TTC TAT CAG ACC TTC | AAC CTA CTT GGT CAG GAT GGA TG    |
| SINE B1      | CAT GGT GGC GCA CGC CTT TAA TCC | CCA GGC TGG CCT CGA ACT CAG AAA   |
| SINE B2      | GGG CTG GAG AGA TGG CTC AGT GGT | GCC ACC ATG TGG TTG CTG GGA ATT G |
| <i>Gapdh</i> | AGG TCG GTG TGA ACG GAT TTG     | TGT AGA CCA TGT AGT TGA GGT CA    |
